# Supplementary material for: Research priorities for public health and social measures to manage epidemics: a multi-method consensus study
Source: Research Square preprint supplement (doi:10.21203/rs.3.rs-5519570/v1), 2026-02-09
Supplement: Supplementary file 1 [file 2d34675196d4ca3981db32b5.xlsx]

## Sheet: List of PHSM
WHO-taxonomy, main categories	Subcategory 1	Subcategory 2	Description of interventions	Targeted groups/settings/scope (varies from country to country) All - refers to all possible target groups, settings and scopes)	Recommended/ required by most national governments	Sources WHO PHSM - World Health Org. Public Health and Social Measures group ECDC - European Centre for Disease Control Norway - list of interventions collected by Norwegian Institute of Public Health
1. Individual measures	1.1 Performing hand hygiene		Perform hand hygiene with soap and water or hand sanitizer	All, schools, businesses, institutions etc.	Recommended/Required	WHO_PHSM, Norway, ECDC
	1.2 Limiting face touching		Avoid touching the face	All	Recommended	WHO_PHSM, ECDC
	1.3 Performing respiratory etiquette		Cough or sneeze into the elbow or a disposable tissue	All	Recommended	WHO_PHSM, Norway, ECDC
	1.4 Wearing a mask		Wear a face mask	All or vulnerable groups, when in contact with others, when sick or with symptoms	Recommended/Required	WHO_PHSM, Norway, ECDC
			Use face mask, or resprator mask (FFP2/3)	In specific settings (public transport, schools, institutions etc.)	Recommended/Required	WHO_PHSM, Norway, ECDC
			Use face mask, or resprator mask (FFP2/3)	In specific professions (taxi-/busdrivers, health care workers, police)	Recommended/Required	WHO_PHSM, Norway, ECDC
	1.5 Using other personal protective equipment (PPE)		Use gloves, glasses/visor, or other PPE	All, in public places	Recommended/Required	WHO_PHSM
			Advise against the use of gloves	All, in public places	Recommended	WHO_PHSM, Norway, ECDC
			Use PPE at work	Employees in institutions or on flights	Required	WHO_PHSM, Norway, ECDC
	1.6 Physical distancing		Keep a distance (1-2 meters) from others	All, outside home	Recommended/Required	WHO_PHSM, Norway, ECDC
			Avoid handshakes, hugs, kisses	All	Recommended	WHO_PHSM, Norway, ECDC
			Wear a face mask if distance cannot be avoided	All	Recommended/Required	WHO_PHSM, Norway, ECDC
			Avoid queues and crowds	All, outside home	Recommended	WHO_PHSM, Norway, ECDC
			Limit the number of regular contacts	All	Recommended	WHO_PHSM, Norway, ECDC
2. Environmental measures	2.1 Cleaning and disinfecting surfaces and objects		Regular cleaning and disinfection of surfaces and objects	All, buildings use by many	Recommended/Required	WHO_PHSM, Norway, ECDC
			Thorough disinfection before start-up	Schools after closure, flights, health care facilities	Required	WHO_PHSM
			Extensive disinfection with spraying, flushing, fumigation or UV-light	Public places outside, objects, goods, public transport, persons	Required	WHO_PHSM
			Quarantine period before use	Imported goods	Required	WHO_PHSM
	2.2 Improving air ventilation		Regular ventilation of rooms	Rooms used by many	Recommended/Required	WHO_PHSM, Norway, ECDC
			Monitor ventilation	Rooms used by many	Recommended/Required	WHO_PHSM, Norway, ECDC
			Maintain/ensure proper ventilation	Rooms used by many, schools, health care facilities	Recommended/Required	WHO_PHSM, Norway, ECDC
			Use bactericide recircultators (UV-light)	Airports	Recommended	WHO_PHSM
			Do not use air conditioning	Rooms used by many	Required	WHO_PHSM
			Prioritize outdoor activities	Fitness	Recommended	WHO_PHSM, Norway
	2.3 Increasing room humidification		Use a humidifier or spay rooms regularly	Rooms used by many	Recommended	WHO_PHSM
3. Testing, Isolation, Contact tracing, Quarantine and Surveillance	3.1 Detecting and isolating cases	3.1.1 Passive case detection	Targeted (indication-led) testing	Travelers from high-endemic areas, hospitalized, alle with defined symptoms	Recommended/Required	WHO_PHSM, Norway, ECDC
			Test to protect vulnerable persons/groups	Employees and visitors in institutions	Recommended/Required	WHO_PHSM, Norway, ECDC
			Make rapid tests available	All with symptoms, or after contact with known cases	Recommended	WHO_PHSM, Norway
		3.1.2 Active case detection	Targeted screening in specific populations	All students, employees and patients/residents in institutuions		WHO_PHSM, Norway
			Random mass testing	Door-to-door, all in public places	Recommended/Required	WHO_PHSM
			Checkpoints with control of temperature/symptoms and testing	Travelers/In public places	Required	WHO_PHSM
		3.1.3 Personal guidance and isolation	Individual guidance on infection prevention and control	All cases	Recommended	Norway, suggestions from IPC-personnel at NIPH 19/4-23
			Stay home when sick	All cases	Recommended	WHO_PHSM, Norway, ECDC
			Mandatory isolation for defined period with/without testing	All cases, at home or in dedicated isolation facilities	Required	WHO_PHSM, Norway, ECDC
			Cohort isolation	Cases at the same place, at home or in institutions	Recommended	WHO_PHSM, Norway, ECDC
			Provide isolation facilities	Cases who cannot be isolated at home	Recommended/Required	Norway, suggestions from IPC-personnel at NIPH 19/4-23
	3.2 Tracing and quarantining contacts	3.2.1 Contact tracing	Manual interview of contacts	Contacts of known cases	Recommended/Required	WHO_PHSM, Norway, ECDC
			Develop data management system to support tracing/follow-up of contacts	Contacts of known cases	Recommended	WHO_PHSM, Norway, ECDC
			Use technolgy enhanced systems to support tracing (mobile app, QR code/registration, web-based self-reporting)	All exposed	Recommended	WHO_PHSM, Norway
			Positive cases responsible to notify their close contacts	All cases and close contacts	Recommended	WHO_PHSM, Norway
			Use military and police forces for contact tracing	All cases and close contacts	Required	WHO_PHSM
			Register travelers	All travelers, or from high-endemic areas	Recommended/Required	WHO_PHSM, Norway, ECDC
			Register guests/visitors	All in defined businesses/services	Recommended	WHO_PHSM, Norway
		3.2.2 Quarantine	Define close contacts	Contacts of known cases	Recommended/Required	Norway, suggestions from IPC-personnel at NIPH 19/4-23
			Regular follow-up of contacts	Contacts of known cases	Recommended/Required	Norway, suggestions from IPC-personnel at NIPH 19/4-23
			Individual guidance on infection prevention and control	Contacts of known cases	Recommended/Required	Norway, suggestions from IPC-personnel at NIPH 19/4-23
			Qurarantine for defined period	Contacts, at home or in defined quarantine facilities	Recommended/Required	WHO_PHSM, Norway, ECDC
			Waiting time before or testing instead of quarantine	Contacts without symptoms	Recommended/Required	WHO_PHSM, Norway
			Testing to shorten quarantine period	Contacts without symptoms	Recommended/Required	WHO_PHSM, Norway
			Garantee paid sick leave/salary to increase compliance with quarantine regulations	Close contacts in danger of losing income during quarantine period	Required	Norway, suggestions from IPC-personnel at NIPH 19/4-23
			Provide quarantine facilities	Contact who cannot be qurantined at home	Recommended	Norway, suggestions from IPC-personnel at NIPH 19/4-24
	3.3 Surveillance	3.3.1 Confirmed cases	Register and publish the number of cases	Measurement of identified cases over time	Required	Norway, suggestions from IPC-personnel at NIPH 19/4-23
			Microbial genome sequecing	Measurement of distribution of microbe variants	Recommended	WHO_PHSM, Norway, ECDC
		3.3.2 Symptoms or signals	Surveillance of microbes in wastewater	Mearurement of trend	Recommended	WHO_PHSM, Norway
			Regular surveys in the population	Mearurement of trend	Recommended	Norway, suggestions from IPC-personnel at NIPH 19/4-23
4. Social and physical distancing measures, adaptation to settings	4.1.School measures	4.1.1 Adapting	Have groups with few individuals and limit contact between groups	Children and youth in nurseries and schools	Recommended/Required	WHO_PHSM, Norway, ECDC
			Avoid crowds, start classes at different times, extend school hours	Children and youth in nurseries and schools	Recommended	Norway, ECDC, suggestions from IPC-personnel at NIPH 19/4-23
			Hybrid education/limit the number of in-person learning	Children and youth in nurseries and schools	Recommended	WHO_PHSM, Norway, ECDC
			Work at home and have digital meetings when feasible	Employees in nurseries and schools	Recommended	WHO_PHSM, Norway
			Suspend some indoor activities and prioritize outdoor activities	Children and youth in nurseries and schools	Recommended	WHO_PHSM, Norway, ECDC
			Regular screening	Employees, children and students	Recommended/Required	WHO_PHSM, Norway
			Use a traffic light system with bundles of measures	Children and youth in nurseries and schools	Recommended	WHO_PHSM, Norway
		4.1.2 Closing	Proactive closure when incidence in population increases, without remote learning or excemption	Children and employees in nurseries and schools	Required	WHO_PHSM, Norway, ECDC
			Proactive closure with remote learning and/or excemption	Children and employees in nurseries and schools	Required	WHO_PHSM, Norway, ECDC
			Reactive closure to stop the spread in schools	Parts of or all of nurseries and schools	Required	WHO_PHSM, Norway, ECDC
	4.2 Offices, businesses, institutions and operations	4.2.1 Adapting	Work at home	Employees	Recommended/Required	WHO_PHSM, Norway, ECDC
			Flexible working hours and avoid crowding	Employees	Recommended	WHO_PHSM, Norway, ECDC
			Ensure and organize sufficient infection prevention and control	Employees	Required	Norway, ECDC, suggestions from IPC-personnel at NIPH 19/4-23
			Offer and facilitate the use of face masks	Employees, visitors or customers	Recommended	WHO_PHSM, Norway, ECDC
			Install plexiglass/physical barriers and ensure distance	Employees, visitors or customers	Recommended	WHO_PHSM, Norway, ECDC
			Make hand sanitizer available and ensure regular use	Employees, visitors or customers	Recommended	WHO_PHSM, Norway, ECDC
			Register persons present	Employees, visitors or customers	Recommended/Required	WHO_PHSM, Norway, suggestions from IPC-personnel at NIPH 19/4-23
			Limit or ban the sale/serving of alcohol	Visitors or customers	Required	WHO_PHSM, Norway
			Require COVID pass or testing before entry/services	Visitors or customers	Required	WHO_PHSM, Norway
			Protect particularly exposed professions (PPE, physical barriers, distance)	Employees	Recommended/Required	WHO_PHSM, Norway, suggestions from IPC-personnel at NIPH 19/4-23
		4.2.2 Closing	Proactive closure of business	Employees, visitors or customers	Required	WHO_PHSM, Norway, ECDC
			Reactive closure of business	Employees, visitors or customers	Required	WHO_PHSM, Norway, ECDC
			Closure of activities or services	Employees, visitors or customers	Required	WHO_PHSM, Norway, ECDC
	4.3 Gatherings, businesses and services	4.3.1 Restricting private gatherings at home	Prohibit guests	All	Required	WHO_PHSM, Norway, ECDC
			Allow a defined number of guests indoors and/or outdoors	All	Required	WHO_PHSM, Norway, ECDC
		4.3.2 Cancelling, restricting or adapting private gatherings outside the home	Prohibit gatherings	All	Required	WHO_PHSM, Norway, ECDC
			Allow a defined number of people present	All	Required	WHO_PHSM, Norway, ECDC
			Allow a defined number of people per square meter	All	Required	WHO_PHSM, Norway, ECDC
		4.3.3 Cancelling, closing, restricting or adapting public gatherings outside the home	Prohibit gatherings	All	Required	WHO_PHSM, Norway, ECDC
			Allow a defined number of people present	All	Required	WHO_PHSM, Norway, ECDC
			Allow a defined number of people per square meter	All	Required	WHO_PHSM, Norway, ECDC
			Allow a defined rate of full capasity of the premises	All	Required	WHO_PHSM, Norway, ECDC
			Allow rehearsal/digital events without an audience present	All	Required	WHO_PHSM, Norway, ECDC
			Avoid queuing and crowding	All	Required	WHO_PHSM, Norway, ECDC
			Use physical barriers and facilitate distancing	All	Required	WHO_PHSM, Norway, ECDC
		4.3.4 Cancelling, restricting or adapting mass gatherings	Ban events	All	Required	WHO_PHSM, Norway, ECDC
			Allow a defined number of people present	All	Required	WHO_PHSM, Norway, ECDC
			Allow a defined number of people per square meter	All	Required	WHO_PHSM, Norway, ECDC
			Allow a defined rate of full capasity of the premises	All	Required	WHO_PHSM, Norway, ECDC
			Allow competitions/events without an audience present	All	Required	WHO_PHSM, Norway, ECDC
			Avoid queuing and crowding	All	Required	WHO_PHSM, Norway, ECDC
			Use physical barriers and facilitate distancing	All	Required	WHO_PHSM, Norway, ECDC
			Perform risk analysis and develop infection control plan	All	Required	WHO_PHSM, Norway, ECDC
	4.4 Special populations	4.4.1 Shielding vulnerable groups	Stay at home, avoid visits, or limit the number of contacts	Eldrly and high-risk groups	Recommended/Required	WHO_PHSM, Norway, ECDC
			Avoid travel	Eldrly and high-risk groups	Recommended	WHO_PHSM, Norway, ECDC
			Offer regular digital follow-up	Eldrly and high-risk groups	Recommended	WHO_PHSM, Norway, ECDC
			Bring necessary goods and services home	Eldrly and high-risk groups	Recommended	WHO_PHSM
			Have dedicated opening hours in public places, retail and services	Eldrly and high-risk groups	Recommended /Required	WHO_PHSM, suggestions from IPC-personnel at NIPH 19/4-23
			Prioritize testing, examination and treatment, and vaccination	Eldrly and high-risk groups	Recommended	WHO_PHSM, Norway, ECDC
		4.4.2 Protecting populations in closed settings	Ensure and organize sufficient infection prevention and control	Employees	Required	Norway, ECDC, suggestions from IPC-personnel at NIPH 19/4-23
			Prohibit or limit visits	Visitors	Recommended/Required	WHO_PHSM, Norway
			Use PPE in professional practice	Employees	Required	WHO_PHSM, Norway, ECDC
			Regular testing	Employees or residents/patients/inmates	Recommended/Required	WHO_PHSM, Norway, ECDC
			Prioritize testing, examination and treatment, and vaccination	Employees or residents/patients/inmates	Recommended	WHO_PHSM, Norway, ECDC
			Postpone elective admissions or non-urgent tasks	Employees or residents/patients/inmates	Recommended	WHO_PHSM, Norway, ECDC
			Hasten discharge	Patients/inmates	Recommended	WHO_PHSM, Norway, ECDC
		4.4.3 Protecting displaced populations	Close entry and exit	Asylum centres/refugee camps	Required	WHO_PHSM
			Stop or limit visits	Asylum centres/refugee camps	Required	WHO_PHSM
			Intensify testing and health examinations	Migrants	Recommended	WHO_PHSM, Norway
			Reduce the number of residents per unit and organize in groups or cohorts	Migrants	Recommended	WHO_PHSM, Norway
			Ensure resources and space for isoltion and quarantine	Migrants	Recommended	WHO_PHSM, Norway
	4.5 Domestic travel	4.5.1 Suspending or restricting movement	Prohibit or limit public transport	All	Recommended/Required	WHO_PHSM, Norway, ECDC
			Limit travel across local/regional borders	All	Recommended/Required	WHO_PHSM, Norway
			Limit the number of passengers aboard buses, trains, boats and other public transport	All	Recommended/Required	Norway, suggestions from IPC-personnel at NIPH 21/4-23
		4.5.2 Stay-at-home order	Curfew, stay-at-home order and only leave house if necessary	All	Required	WHO_PHSM, Norway
			Close down trade and services during curfew, or only keep open for defined target groups	All, eldrly and high-risk groups	Required	WHO_PHSM, Norway
			Children and youth under 18 must be escorted when outside	Children and youth	Required	WHO_PHSM
		4.5.3 Restricting entry	Require COVID pass or testing and quarantine upon arrival for a high-endemic area	All	Required	WHO_PHSM, Norway
			Ban overnight stays in holiday homes	All	Required	Norway
		4.5.4 Closing internal land borders	Stop domestic transport across local borders	Flights, train and other regional transport	Required	WHO_PHSM, Norway
			Prevent people on ships from going ashore	Employees and passengers on ferries and ships	Required	WHO_PHSM, Norway
			Prohibition of entry to Svalbard for persons with quarantine obligation	All contacts, exposed and travelers from high-risk areas	Required	Norway
	4.6 Measures to increase support and compliance	4.6.1 Inform about and increase support for pandemic measures	Information campaigns	All, specific vulnerable or marginalized groups	Recommended	Norway, suggestions from IPC-personnel at NIPH 19/4-23
			Call center, ongoing advisory service for the population	General population, local authorities, businesses or services	Recommended	Norway
			Advisory team, ongoing advisory to local health authorities for assessment and coordination of measures	Local and regional health authorities	Recommended	Norway
			Press conferences	All	Recommended	Norway, suggestions from IPC-personnel at NIPH 19/4-23
			Coordination of government communication	All, population groups, businesses and services	Recommended	Norway, suggestions from IPC-personnel at NIPH 19/4-23
			Infodemic management, monitoring and management of misinformation and increase trust and compliance to measures	All	Recommended	suggestions from IPC-personnel at NIPH 21/4-23
			Translate measures and information	Non-native speakers	Recommended	Norway, suggestions from IPC-personnel at NIPH 19/4-23
			Reach out to subpopulations and provide tergeted information	Marginalized groups, or persons not seeking information from the health authorities or domestic media	Recommended	Norway, suggestions from IPC-personnel at NIPH 19/4-23
			Use the interpreter service when conveying information	Marginalized groups, or persons not seeking information from the health authorities or domestic media	Recommended	Norway, suggestions from IPC-personnel at NIPH 19/4-23
			Use key persons in the community to disseminate information	Marginalized groups, or persons not seeking information from the health authorities or domestic media	Recommended	Norway, suggestions from IPC-personnel at NIPH 19/4-23
		4.6.2 Supervision and control	Supervision of infection contol in the municipalities by the County Governor	Local authorities, general population	Required	Norway, suggestions from IPC-personnel at NIPH 19/4-23
			Guidelines and provisions for local management by the Directorate of Health	Local authorities, institutions, businesses, general population	Required	Norway, suggestions from IPC-personnel at NIPH 19/4-23
			Supervision of companies' protection of employees by the Labour Inspection Authority	Managers and employees of businesses and institutions	Required	Norway, suggestions from IPC-personnel at NIPH 19/4-23
			Supervision of infection control in health services and management of the pandemic, by the Board of Health Supervision	Managers and employees in health care	Required	Norway, suggestions from IPC-personnel at NIPH 19/4-23
			Public committee evaluation of government management of the pandemic	National authorities	Recommended	Norway, suggestions from IPC-personnel at NIPH 19/4-23
	4.7 Organization of pandemic management	4.7.1 Organization of infection control/pandemic management	National strategy and organization	National authorities	Required	Norway, suggestions from IPC-personnel at NIPH 19/4-23
			Regional/local organization and management	Regional and local authorities	Required	Norway, suggestions from IPC-personnel at NIPH 19/4-23
			National/local preparedness prior to the pandemic	National and local authorities	Required	Norway, suggestions from IPC-personnel at NIPH 19/4-23
			Redeployment of resources in the health services to handle the pandemic	Managers, employees and patients in health care	Required	Norway, suggestions from IPC-personnel at NIPH 19/4-23
5. International travel measures	5.1 Providing travel advice and warning		Travel advice and warnings against travel to high-endemic areas	All	Recommended	WHO_PHSM, Norway, ECDC
	5.2 Restricting visas		Suspension of visas upun arrival	All travelers or from high-risk areas	Required	WHO_PHSM
			Limit the possibility of visas	All travelers or from high-risk areas	Required	WHO_PHSM
	5.3 Restricting entry		Deny entry from all or high-endemic areas	All travelers or from high-risk areas	Required	WHO_PHSM, Norway
			Limit entry from all or high-endemic areas	All travelers or from high-risk areas	Required	WHO_PHSM, Norway
	5.4 Restricting exit		Prohibit travel out of the country to high-endemic areas	All, key personnel in health care or emergency units	Required	WHO_PHSM, Norway
			Limit travel out of the country to high-endemic areas	All, key personnel in health care or emergency units	Recommended	WHO_PHSM, Norway
	5.5 Entry screening and isolation or quarantine		Assess exposure or check temperature, symptoms, vaccination status etc.	All travelers or from high-risk areas	Recommended/Required	WHO_PHSM, Norway, ECDC
			Establish a control center that follows up on new arrivals	All travelers or from high-risk areas	Required	WHO_PHSM, Norway, ECDC
			Require COVID pass or test upon arrival	All travelers or from high-risk areas	Required	WHO_PHSM, Norway, ECDC
			Isolation of travelers with symptoms or positive test	All possible or confirmed cases	Required	WHO_PHSM, Norway, ECDC
			Quarantine for all	All travelers, at home or dedicated quarantine facility	Required	WHO_PHSM, Norway, ECDC
			Quarantine on an individual basis	All travelers, at home or dedicated quarantine facility	Required	WHO_PHSM, Norway, ECDC
	5.6 Exit screening and isolation or quarantine		Demand for a COVID pass or recent test before departure	All travelers, based on requirements at country of entry	Required	WHO_PHSM, Norway, ECDC
	5.7 Suspending or restricting international fligths		Suspend international flights to or from high-endemic areas	All travelers	Required	WHO_PHSM
			Limit international flights to or from high-endemic areas	All travelers	Required	WHO_PHSM
			Contact tracing after flights	All travelers	Required	Norway
	5.8 Suspend or restricting international ferries or ships		Prohibit shipping or entry into the country	Employees and passengers	Required	WHO_PHSM, Norway
			Suspend cruises from other countries, or stop employees and passangers from disembarking	Employees and passengers	Required	WHO_PHSM, Norway
			Stop further travel upon suspicion of an outbreak on board	Employees and passengers	Required	Norway
			Outbreak management on board ships	Employees and passengers	Required	Norway
			Contact tracing after ship travel	All travelers	Required	Norway
	5.9 Closing international land borders		Close the borders	All travelers	Required	WHO_PHSM
			Local control with all closed borders	All travelers	Required	Norway
