# Supplementary material for: Research priorities for public health and social measures to manage epidemics: a multi-method consensus study
Source: Research Square preprint supplement (doi:10.21203/rs.3.rs-5519570/v1), 2026-02-09
Supplement: Supplementary file 1 [file 216d5cc6ce9f765861197f97.pdf]

# Feedback on list of interventions

Please provide feedback on the list of interventions (attached in the email) using the fields below.

See details under each main category below.

When providing feedback, be sure to indicate which interventions and/or targeted population, setting, scope, etc you are referring to when appropriate.

## 1. 1. Individual measures

*If you think an intervention is missing from this category, please write the name and a short description of the intervention (answer in English or Norwegian).*

---

---

---

---

---

## 2. 2. Environmental measures

*If you think an intervention is missing from this category, please write the name and a short description of the intervention (answer in English or Norwegian).*

---

---

---

---

---

3. **3. Testing, Isolation, Contact tracing, Quarantine and Surveillance**

*If you think an intervention is missing from this category, please write the name and a short description of the intervention (answer in English or Norwegian).*

---

---

---

---

---

4. **4. Social and physical distancing measures, adaptation to settings**

*If you think an intervention is missing from this category, please write the name and a short description of the intervention (answer in English or Norwegian).*

---

---

---

---

---

5. **5. International travel measures**

*If you think an intervention is missing from this category, please write the name and a short description of the intervention (answer in English or Norwegian).*

---

---

---

---

---

**6. Other**

*Please write any comments or feedback that do not fit under one main category. For example, if you have comments on how the main categories are organized, or if there is a main category of interventions missing.*

---

---

---

---

---

---

This content is neither created nor endorsed by Google.

Google Forms
