# Supplementary material for: Research priorities for public health and social measures to manage epidemics: a multi-method consensus study
Source: Research Square preprint supplement (doi:10.21203/rs.3.rs-5519570/v1), 2026-02-09
Supplement: Supplementary file 2 [file 2f1bb2de0dadf810c52b93e7.docx]

# Appendix 7- List of prioritized public health and social measures

| Intervention |
| --- |
| Hand hygiene |
| Wearing a face mask |
| Ventilation of rooms |
| TISK - Detecting and isolating cases – Indication led testing or targeted screening |
| Staying home when sick |
| Contact tracing (incl 3.2.1.3 use technology enhanced systems to support tracing (mobile app, etc) |
| Quarantine |
| Surveillance of microbes in wastewater |
| School measures – adapting or closing |
| Offices, businesses, institutions and operations – adapting (e.g. require COVID pass or testing before entry/services) or closing |
| Shielding vulnerable groups |
| Protecting populations in closed settings - prohibit or limit visits |
| Domestic travel - Limit travel across local/regional borders or Curfew, stay-at-home order and only leave house if necessary |
| Measures to increase support and compliance - Inform about and increase support for pandemic measures |
| Organization of infection control/pandemic management |
| Denying entry from all or high-end areas |
| Demanding a COVID pass or recent test before departure |
| Closing borders |
