# Supplementary material for: Research priorities for public health and social measures to manage epidemics: a multi-method consensus study
Source: Research Square preprint supplement (doi:10.21203/rs.3.rs-5519570/v1), 2026-02-09
Supplement: Supplementary file 2 [file e5e764369786b0fe995587a6.pdf]

# Prioritizing public health and social epidemic intervention research

In this form you will be able to indicate which interventions you think are most important to research.

Please note that

- 1 - the most important public health and social epidemic intervention
- 2 - the second most important public health and social epidemic intervention
- 3 - the third most important public health and social epidemic intervention

Please indicate **both the number of the intervention and the intervention name** (e.g., 3.2.1.3. Use technology enhanced systems to support tracing)

Please identify interventions from **Column D**.

For each intervention, we have included space where you can specify the population and setting in which the intervention should be evaluated, details about the intervention and what it should be compared to, and the main outcomes that should be measured. However, our focus at this stage is on the intervention and it is not necessary to fill in that information.

---

\* Indicates required question

1. Your name:

---

**Most important intervention to research**

2. What is the **most important** intervention to research? \*

Please give the **number** of the intervention here (e.g., 4.2.1.1.)

---

---

---

---

---

3. What is the **most important** intervention to research? \*

Please give the **name** of the intervention here (e.g., Work at home)

---

---

---

---

---

4. Optional information about the research you would prioritise for this intervention (1):

a) Population or setting in which the intervention should be evaluated:

---

---

---

---

---

5. Optional information about the research you would prioritise for this intervention (1):

b) Additional information about the intervention that should be evaluated and what it should be compared to:

---

---

---

---

---

6. Optional information about the research you would prioritise for this intervention (1):

c) Main outcomes that should be measured:

---

---

---

---

---

### Second most important intervention

7. What is the **second most important** intervention to research? (2) \*

Please give the **number** of the intervention here (e.g., 4.2.1.1.)

---

---

---

---

---

8. What is the **second most important** intervention to research? (2) \*

Please give the **name** of the intervention here (e.g., Work at home)

---

---

---

---

---

9. Optional information about the research you would prioritise for this intervention (2):

a) Population or setting in which the intervention should be evaluated:

---

---

---

---

---

10. Optional information about the research you would prioritise for this intervention (2):

b) Additional information about the intervention that should be evaluated and what it should be compared to:

---

---

---

---

---

11. Optional information about the research you would prioritise for this intervention (2):

c) Main outcomes that should be measured:

---

---

---

---

---

### Third most important intervention to research

12. What is the **third most important** intervention to research? (3) \*

Please give the **number** of the intervention here (e.g., 4.2.1.1.)

---

---

---

---

---

13. What is the **third most important** intervention to research? (3) \*

Please give the **name** of the intervention here (e.g., Work at home)

---

---

---

---

---

14. Optional information about the research you would prioritise for this intervention (3):

a) Population or setting in which the intervention should be evaluated:

---

---

---

---

---

15. Optional information about the research you would prioritise for this intervention (3):

b) Additional information about the intervention that should be evaluated and what it should be compared to:

---

---

---

---

---

16. Optional information about the research you would prioritise for this intervention (3):

c) Main outcomes that should be measured:

---

---

---

---

---

This content is neither created nor endorsed by Google.

## Google Forms
