# Supplementary material for: Research priorities for public health and social measures to manage epidemics: a multi-method consensus study
Source: Research Square preprint supplement (doi:10.21203/rs.3.rs-5519570/v1), 2026-02-09
Supplement: Supplementary file 3 [file fd2343fdc0345252252a9569.pdf]

# Identifying research questions regarding the effects of public health and social measures to prevent and control epidemics

*Based on the input we have received, we have prioritised 22 of 178 epidemic interventions. In this survey, we would like to clarify what you believe are important questions about each intervention.*

*It can take time to respond to this survey. We ask you to formulate up to three research questions about the effects of each intervention that you think are important to answer in order to better inform future decisions. **If you are unable to develop questions for all 22 interventions, please develop questions for the interventions that are most important to you.***

## **Why is this survey important?**

There are many questions that could be asked about each intervention. We need to clarify which questions are most important before apply criteria for prioritising the questions. We are using a James Lind Alliance Priority Setting Partnership (PSP) approach to do this.

The final list of prioritised questions will be used by CEIR to guide future research. In addition, we will publish the list in a scientific journal and share it with other researchers, research funders, and policymakers.

## **Do I have to write a research question?**

No. Write as much or as little as you like. It is enough to write a short sentence about something that is important to you. We will treat all answers confidentially. We will not share your personal details with anyone and no one will know it is you who has sent in the questions.

For each type of intervention, please write your questions indicating the population, intervention, comparison, outcomes and setting you are most interested in (if possible). You will be able to submit up to 3 questions per intervention.

You do not have to submit a question for every intervention.

## **What happens next?**

We will synthesize the questions that you and others send us, and then check the extent to which currently available research answers each question. We will then apply an agreed upon set of criteria to each question for which there is important uncertainty about the answer.

1. What question(s) do you want research to address in relation to hand hygiene?

Please try to write your question using the following format where possible:

**population:**

**intervention:**

**comparison:**

**outcomes:**

**setting:**

You can submit up to 3 questions per intervention

---

---

---

---

---

2. What question(s) do you want research to address in relation to face masks?

Please try to write your question using the following format where possible:

**population:**

**intervention:**

**comparison:**

**outcomes:**

**setting:**

You can submit up to 3 questions per intervention

---

---

---

---

---

3. What question(s) do you want research to address in relation to air ventilation?

Please try to write your question using the following format where possible:

**population:**

**intervention:**

**comparison:**

**outcomes:**

**setting:**

You can submit up to 3 questions per intervention

---

---

---

---

---

4. What question(s) do you want research to address in relation to testing and screening?

Please try to write your question using the following format where possible:

**population:**

**intervention:**

**comparison:**

**outcomes:**

**setting:**

You can submit up to 3 questions per intervention

---

---

---

---

---

5. What question(s) do you want research to address in relation to contact tracing?

Please try to write your question using the following format where possible:

**population:**

**intervention:**

**comparison:**

**outcomes:**

**setting:**

You can submit up to 3 questions per intervention

---

---

---

---

---

6. What question(s) do you want research to address in relation to quarantine?

Please try to write your question using the following format where possible:

**population:**

**intervention:**

**comparison:**

**outcomes:**

**setting:**

You can submit up to 3 questions per intervention

---

---

---

---

---

7. What question(s) do you want research to address in relation to isolation (e.g., stay at home when sick)?

Please try to write your question using the following format where possible:

**population:**

**intervention:**

**comparison:**

**outcomes:**

**setting:**

You can submit up to 3 questions per intervention

---

---

---

---

---

8. What question(s) do you want research to address in relation to surveillance?

Please try to write your question using the following format where possible:

**population:**

**intervention:**

**comparison:**

**outcomes:**

**setting:**

You can submit up to 3 questions per intervention

---

---

---

---

---

9. What question(s) do you want research to address in relation to school-related public health measures (e.g., cohorts/bubbles, distance, outdoor gym classes)?

Please try to write your question using the following format where possible:

**population:**

**intervention:**

**comparison:**

**outcomes:**

**setting:**

You can submit up to 3 questions per intervention

---

---

---

---

---

10. What question(s) do you want research to address in relation to closing schools?

Please try to write your question using the following format where possible:

**population:**

**intervention:**

**comparison:**

**outcomes:**

**setting:**

You can submit up to 3 questions per intervention

---

---

---

---

---

11. What question(s) do you want research to address in relation to requiring Covid pass or testing before entering a business or receiving a service?

Please try to write your question using the following format where possible:

**population:**

**intervention:**

**comparison:**

**outcomes:**

**setting:**

You can submit up to 3 questions per intervention

---

---

---

---

---

12. What question(s) do you want research to address in relation to closing businesses and services?

Please try to write your question using the following format where possible:

**population:**

**intervention:**

**comparison:**

**outcomes:**

**setting:**

You can submit up to 3 questions per intervention

---

---

---

---

---

13. What question(s) do you want research to address in relation to restricting private, public or large gatherings?

Please try to write your question using the following format where possible:

**population:**

**intervention:**

**comparison:**

**outcomes:**

**setting:**

You can submit up to 3 questions per intervention

---

---

---

---

---

14. What question(s) do you want research to address in relation to shielding vulnerable groups?

Please try to write your question using the following format where possible:

**population:**

**intervention:**

**comparison:**

**outcomes:**

**setting:**

You can submit up to 3 questions per intervention

---

---

---

---

---



15. What question(s) do you want research to address in relation to protecting populations in closed settings (e.g., prohibit or limit visits in nursing homes)?

Please try to write your question using the following format where possible:

**population:**

**intervention:**

**comparison:**

**outcomes:**

**setting:**

You can submit up to 3 questions per intervention

---

---

---

---

---

16. What question(s) do you want research to address in relation to social distancing?

Please try to write your question using the following format where possible:

**population:**

**intervention:**

**comparison:**

**outcomes:**

**setting:**

You can submit up to 3 questions per intervention

---

---

---

---

---

17. What question(s) do you want research to address in relation to limiting domestic travel and pandemics?

Please try to write your question using the following format where possible:

**population:**

**intervention:**

**comparison:**

**outcomes:**

**setting:**

You can submit up to 3 questions per intervention

---

---

---

---

---

18. What question(s) do you want research to address in relation to measures to increase support and compliance (e.g., informing about and increasing support for pandemic measures, education about pandemic, targeted communication with minority and marginalized groups)?

Please try to write your question using the following format where possible:

**population:**

**intervention:**

**comparison:**

**outcomes:**

**setting:**

You can submit up to 3 questions per intervention

---

---

---

---

---

19. What question(s) do you want research to address in relation to organization of infection control/pandemic management?

Please try to write your question using the following format where possible:

**population:**

**intervention:**

**comparison:**

**outcomes:**

**setting:**

You can submit up to 3 questions per intervention

---

---

---

---

---

20. What question(s) do you want research to address in relation to denying entry from all or high-endemic areas?

Please try to write your question using the following format where possible:

**population:**

**intervention:**

**comparison:**

**outcomes:**

**setting:**

You can submit up to 3 questions per intervention

---

---

---

---

---

21. What question(s) do you want research to address in relation to demanding a Covid pass or recent test before travel?

Please try to write your question using the following format where possible:

**population:**

**intervention:**

**comparison:**

**outcomes:**

**setting:**

You can submit up to 3 questions per intervention

---

---

---

---

---

22. What question(s) do you want research to address in relation to closing borders?

Please try to write your question using the following format where possible:

**population:**

**intervention:**

**comparison:**

**outcomes:**

**setting:**

You can submit up to 3 questions per intervention

---

---

---

---

---

---

This content is neither created nor endorsed by Google.

Google Forms
