# Supplementary material for: Research priorities for public health and social measures to manage epidemics: a multi-method consensus study
Source: Research Square preprint supplement (doi:10.21203/rs.3.rs-5519570/v1), 2026-02-09
Supplement: Supplementary file 4 [file 665b53ff0d168f58d398d4e2.docx]

# Public health and social measures - Questions synthesised

## Hand hygiene

|  | Research question |
| --- | --- |
| 1 | What are the effects of using water alone versus soap and water or alcohol-based sanitizer? |
| 2 | What are the effects of improved compliance with hand hygiene advice among health personnel compared to usual practice? |
| 3 | What are the effects of improved hand hygiene routines compared to usual practice in schools or daycare? |
| 4 | What are the effects of increased frequency of hand hygiene compared to usual practice in the general population? |
| 5 | What are the effects of different modes of encouraging hand hygiene in shopping centres (sanitizer dispenser, signs, messages) and improved availability compared to usual practice? |
| 6 | What are the effects of national recommendations for hand hygiene on hand hygiene routines? |

## Face masks

|  | **Research question** |
| --- | --- |
| 1 | What are the effects of medical face masks compared to cloth face masks, respirators, or no masks in healthcare settings, outdoor settings, shopping centres, public transportation or other public places? |
| 2 | What are the effects of carefully designed instructions about face masks compared to no instructions? |
| 3 | What are the effects of distributing face masks when people enter GP office waiting rooms compared to not distributing face masks? |

## 3. Ventilation

|  | **Research question** |
| --- | --- |
| 1 | What are the effects of mechanical ventilation compared to air purifiers, natural ventilation, UV room sanitizers, or no ventilation in offices or other indoor spaces where many people are gathered? |
| 2 | What are the effects of different levels of ventilation in indoor rooms of different sizes? |
| 3 | What are the effects of natural ventilation for different time periods (between or during school classes/work meetings and other gatherings) compared to no ventilation? |
| 8 | What are the effects of CO2 sensors to monitor air quality compared to no sensors? |

## 4. Testing and screening

|  | **Research question** |
| --- | --- |
| 1 | What are the effects of screening and isolation of passengers who test positive for respiratory infections on i**nbound international flights** (before, during or after the flight) compared to usual practice? |
| 2 | What are the effects of targeted active screening (routine mass testing) of healthworkers (including nursing home workers) and/or patients/residents compared to regular testing, random screening or passive testing (only people with symptoms or defined indications) in schools, healthcare services, nursing homes, healthcare institutions or other workplaces with high infection rates? |
| 3 | What are the effects of access to rapid/home tests compared to no access in the general population? |
| 4 | What are the effects of isolation and testing with symptoms compared to isolation alone? |
| 5 | What are the effects of testing before isolation/quarantine is ended compared to not testing among close contacts in the general population? |
| 6 | What are the effects of different testing methods and or lab analyses (compared to usual practice? |

## 5. Contact tracing

|  | **Research question** |
| --- | --- |
| 1 | What are the effects of contact tracing (with or without an app) compared to no contact tracing on the incidence rate of infection? |
| 2 | What are the effects of contact tracing compared to no contact tracing on the spread of infection on campus or in boarding schools? |

## 6. Quarantine

|  | **Research question** |
| --- | --- |
| 1 | What are the effects of quarantine for all close contacts compared to quarantine for contacts with symptoms among the general population and in health institutions? |
| 2 | What are the effects of quarantining for different intervals of time after exposure to someone with a respiratory infection? |
| 3 | What are the effects of quarantining in hotel compared to quarantine at home? |

## 7. Isolation

|  | **Research question** |
| --- | --- |
| 1 | What are the effects of isolating for different intervals of time compared to PHSM without isolation after testing positive for a respiratory infection on the risk of infecting cohabitating family members, non-cohabiting friends and work colleagues? |
| 2 | What are the effects of staying home until negative test compared to staying home until symptom free for people with respiratory infection and their home and work contacts? |
| 3 | What are the effects of using a tool for self-evaluation of communicable disease compared to no tools? |

## 8. Surveillance

|  | **Research question** |
| --- | --- |
| 1 | What are the effects of collecting cell tower location information about all individuals with mobile devices compared to not collecting information in areas with large populations? |
| 2 | What are the effects of active surveillance compared to passive surveillance or surveillance of waste water? |
| 3 | What are the effects of surveillance with PCR tests and self-reporting compared to waste water surveillance? |

## 9. School-related PHSM

|  | **Research question** |
| --- | --- |
| 1 | What are the effects different cohort strategies compared to no cohorting or practice as usual in school? |
| 2 | What are the effects of individual interventions compared to packages of interventions for students, teachers and students' families? |
| 3 | What are the effects of indoor physical education classes compared to outdoor physical education classes in school? |
| 4 | What are the effects of testing children in daycare, primary school and secondary school compared to no testing for children who are sent home and their families? |
| 5 | What are the effects of limiting after-school activities (organized and unorganized) to school cohorts compared to after-school activities without school cohorts in school and at daycare? |
| 6 | What are the effects of outdoor schooling, reduced group sizes, social distancing in the classroom and communal areas and reduced contact between groups compared to practice as usual in primary, secondary and vocational school? |
| 7 | What are the effects of lockdown on teachers workload and the work environment, including collaboration, personnel support, well-being and perception of safety and quality of teaching and educational outcomes for children in daycare and school? |
| 8 |  |
| 9 | What are the effects of quarantining a whole class/group with symptoms or positive test compared to quarantine for household contacts only on secondary attack rate, symptomatic infection, severe disease among high school students and staff? |

## 10. School closure

|  | **Research question** |
| --- | --- |
| 1 | What are the effects of the duration of school closure (primary, secondary and post-secondary) for students, faculty, the broader community? |
| 2 | What are the effects of closing schools (with or without online learning) compared to keeping schools open with or without PHSM or using routine testing for teachers, students and their families? |
| 3 | What are the effects of improved air ventilation compared to closing school? |
| 4 | What are the effects of mass testing compared to closing school? |

## 11. Covid pass - business

|  | **Research question** |
| --- | --- |
| 1 | What are the effects of requiring a vaccination certificate to enter the workplace compared to not requiring a certificate or requiring testing in businesses, bars, restaurants, cafes? |
| 2 | What are the effects of a covid pass compared to no covid pass on trust or vaccine uptake? |

## 12. Businesses & Services

|  | **Research question** |
| --- | --- |
| 1 | What is the effect of limiting opening hours of restaurants, bars and cafes (in proportion to prevalence of infection) compared to regular hours on risk of infection? |
| 2 | What is the effect of closing restaurants, bars cafes or cultural settings (in proportion to prevalence of infection) compared to regular hours on risk of infection, economy or mental health? |
| 3 | What is the effect of closing (indoor) training centres compared to practice as usual or open centres with PHSM on risk of infection? |
| 4 | What is the effect of lockdown compared to no lockdown on infection rates, economic consequences, and mental health? |

## 12. Gatherings

|  | **Research question** |
| --- | --- |
| **1** | What are the effects of restrictions on number of people in private or public gatherings compared to no or fewer restrictions? |
| **2** | What are the effects of different sizes of gatherings? |
| **3** | What are the effects of different lengths of a gathering? |
| **4** | What are the effects of different types of gatherings (e.g., wedding, funeral, birthday)? |
| **5** | What are the effects of serving alcohol during gatherings? |
| **6** | What are the effects of different cohort strategies of gatherings? |
| **7** | What are the effects of distancing rules during indoor gatherings compared to person-per-square meter rules? |

## 14. Vulnerable groups

|  | **Research question** |
| --- | --- |
| 1 | What are the effects of targeted information about PHSM compared to no information for vulnerable people living at home on infections, severe cases and mortality? |
| 2 | What are the effects of specific protective measures for fully vaccinated vulnerable individuals (such as facemasks or reduced contact with others) compared to practice as usual on all infections, severe cases and mortality? |
| 3 | What are the effects of targeted vaccination and interventions to improve vaccine coverage for vulnerable populations compared to practice as usual on severe cases and mortality? |
| 4 | What are the effects of active vaccination of everyone compared to active vaccination of vulnerable populations on severe cases and mortality during influenza season? |

## 15. Closed settings

|  | **Research question** |
| --- | --- |
| 1 | What are the effects of visit restrictions compared to no visit restrictions with or without specific PHSM, visiting for vaccinated only, or masks + handwashing + testing in nursing homes on infections, mortality, hospital admittance, loneliness and mental health among residents and their visitors? |
| 2 | What are the effects of different ways of organizing visits in nursing homes compared to practice as usual on infections, traffic, air quality? |

## 16. Social distancing

|  | **Research question** |
| --- | --- |
| 1 | What are the effects of 2 meter distancing vs 1 meter distancing or no rules about social distancing on infection rates in indoor settings for the general population? |
| 2 | What are the effects of limiting the number of regular close contacts compared to no limit on infection rates? |
| 3 | What are the effects of nudging people to comply with social distancing measures using infrastructure, apps, signs, messages, limiting number of visitors or social distancing (1 or 2 meter) compared to no nudges or incentives in public places? |
| 4 | What are the effects of limiting number of regular contacts outside of the household compared to usual practices? |

## 17. Domestic travel

|  | **Research question** |
| --- | --- |
| 1 | What are the effects of travel restrictions within a community compared to no restrictions? |
| 2 | What are the effects of travel restrictions between communities (including regional closing) compared to no restrictions? |

## 18. Support & Compliance

|  | **Research question** |
| --- | --- |
| 1 | What are the effects of communication of uncertainty compared to no communication of uncertainty or communication of varying degrees of uncertainty (different ways of communicating uncertainty) among the general population? |
| 2 | What are the effects of carefully designed and tested messages compared to messages prepared without careful design and testing on infection rates, adherence and trust in the general population or for marginalized groups? |
| 3 | What are the effects of regulations compared to recommendations on compliance and adherence to infection control advice among the general population and relevant subgroups? |

## 19. Organization of pandemic management

|  | **Research question** |
| --- | --- |
| 1 | What are the effects of high predictability compared to low predictability of introduction and removal of control measures (with explicit criteria) on trust, adherence and infection rates? |
| 2 | What are the effects of public participation compared to no public participation in municipal decision-making processes on decision, adherence and trust, research, social solidarity and infection rates? |
| 3 | What are the effects of national decision-making compared to local decision-making with or without national support on decisions, adherence, and trust, research, social solidarity and infection rates for the general population and for marginalized groups? |

## 20. Denying entry from high-endemic areas

|  | **Research question** |
| --- | --- |
| 1 | What is the effect of implementing travel bans from high-endemic areas compared to no ban with or without quarantine, testing, home quarantine or hotel quarantine on infection rates and time until a new variant is introduced in the population in the general population (at various geographic/admin levels), short- and long-term economic costs? |

## 21. Covid pass - travel

|  | **Research question** |
| --- | --- |
| 1 | What are the effects of a covid-pass compared to no covid-pass or test before travel for travellers and their contacts? |

## 22. Closing borders

|  | **Research question** |
| --- | --- |
| 1 | What is the effect of closing borders compared to partial closing or not closing borders with or without quarantine? |

# Non-effect questions

|  | Stakeholder question |
| --- | --- |
| 1 | 1h. what are enablers to improve adherence to good hand hygiene? |
| 2 | 1k. 2) Var det praktiske utfordringar knytt til handhygiene med omsyn til tilgjengelegheit, avstand osb.? |
| 3 | I hvilke situasjoner og eventuelt hvor lenge er skolestenging akseptabelt og gjennomførbart når belastning og kostnader sees i forhold til effekt på smittespredning og forekomst av infeksjoner? |
| 4 | The closing of schools is an area where more knowledge is needed. This should be prioritized because Norway did close schools extensively and this did come with a large burden on school-aged children. Children generally do not become severely ill when infected, a large proportion only get asymptomatic infection, so the threshold for closing schools should be very high and the evidence should be solid to defend this practice. Whether children, generally with few symptoms when infected, are an important source of further spread of SARS-CoV-2 is another aspect which also raises questions in relation to closing of schools. It seems that a retrospective study would be the only feasible approach to study this further. Comparable populations (schools) should be identified which differ only in the intervention: school closure. A timeperiod from the pandemic with high infection-rates of SARS-CoV-2 should be selected. Participants (school-children and their families) should be recruited, interviewed by survey, and with their consent available information on SARS-CoV-2 tests should be retrieved from helsenorge.no AT |
| 5 | 1) Hvordan fungerte dialogen mellom partane, arbeidstakarar og profesjon under nedstenginga? Kven vart involverte? Kva fungerte godt? Kva fungerte ikkje? korleis sikre legitimitet framover? / How did the dialogue between the parties, employees, and professionals function during the lockdown? Who was involved? What worked well? What didn't work? How to ensure legitimacy moving forward? |
| 6 | 2) Korleis opplevde elevar, lærarar og leiarar digitak undervisning? Kva var effekten på læringsmiljøet og arbeidsmiljøet, trivsel, læring, meistring og utvikling hos elevane? / How did students, teachers, and leaders experience digital education? What was the impact on the learning environment, working conditions, well-being, learning, mastery, and development of the students? |
| 7 | 3) Korleis kan lærarar og leiarar saman leggje til rette for læringsmiljø som fremjar læring under ei nedstenging? Korleis kan skuleeigarar medverke? / How can teachers and leaders collaborate to create a learning environment that promotes learning during a lockdown? How can school owners participate? |
| 8 | How many days/weeks were schools actually closed in the different regions in Norway? This is an interesting topic, and might be answered in cooperation with "statsforvaltere" and "kommuner" What were the effects in regarding quality of life, academic results etc. ? |
| 9 | Er bruk av luftrensere et akseptabelt og gjennomførbart tiltak, når nytten i form av reduksjon av infeksjoner sees i forhold til kostnader og aksept for innkjøp, installering og bruk? |
| 10 | 1) I kva grad var ventilasjonen tilfredsstillande medan barnehagar og skular var opne eller delvis nedstengde under pandemien? / "In which city was the ventilation satisfactory while kindergartens and schools were open or partially closed during the pandemic? |
| 11 | 2) Korleis vart tilsette og tillitsvalde involverte i vurderinga av kva som var tilfredsstillande ventilasjon?/How were employees and union representatives involved in the assessment of what constituted satisfactory ventilation? |
| 12 | 3) Vart det gjort konkrete utbetringar av ventilasjonen? Kvifor/kvifor ikkje? / Were there specific improvements made to the ventilation? Why or why not |
| 13 | Hvilket smittenivå passer tester som screening, og for hvilke populasjoner? |
| 14 | Testing to reduce transmission, not easy to study now, but perhaps possible in some settings. New rapid tests that can detect Influenza, Sars-Cov-2 and RS-virus with the same test is possible the best method now. A different method could be multiplex PCR on pooled nasal samples. Can probably test 20-40 samples at once, increase time to answer but decrease cost and increase possible targets. |
| 15 | Under hvilke forhold er kontaktsporing effektivt og gjennomførbart? |
| 16 | How can contact tracing, (i.e. finding out that you have been in contact with somebody infected) help you make informed health choices, like avoiding contacts with others? |
| 17 | Contact tracing apps: Clarify ethical and practical questions concerning the use of such apps in peace time, for example which data should be collected, how to streamline processes so that you will be informed without delay, how much details should be given to those who get a notification on the app about what to do and where the meeting took place. |
| 18 | Når skal man gå over til bare å gi råd om hvordan befolkningen skal gjøre når de er syke og nærkontakter. |
| 19 | Hvor lenge må karantene vare for å hindre videre smitte, og hvor lenge er det akseptabelt og gjennomførbart å holde personer i karantene, når belastning og kostnader med karantene sees i forhold til risiko for smittespredning? |
| 20 | Hvor lenge må isolering vare for å hindre videre smitte, og hvor lenge er det akseptabelt og gjennomførbart å holde personer i isolering, når belastning og kostnader med isolering sees i forhold til risiko for smittespredning |
| 21 | When do people consider themselves sick? What parameters do they use? population: Two gropus with same type of work, intervention: flow chart – self evaluation of communicable diseases, comparison: rate of total sick-leave in the two groups, outcomes: setting: |
| 22 | Does collecting samples from sewerage help authorities make policy decisions that reduce hospitalizations and deaths from respiratory diseases, compared to not collecting such data? |
| 23 | the usefulness of environmental samples in detecting and tracking different pathogens prevalence in a society, predicting disease, hospitalization and death. We have some studies from wastewater on Covid, a few on influenza and RSV, but not enough and lacking for many other pathogens. Can be coupled to intervention studies to measure effect.  wastewater, air sampling from crowded or high risk areas, sampling from surfaces. NGS most relevant, but multiplex PCR possible for some sample-types. |
| 24 | Hvilke tiltak er akseptable og gjennomførbare når belastning og kostnader sees i forhold til effekt på smittespredning og forekomst av infeksjoner? |
| 25 | Hvordan fungerte kohorter i en moderne skole og barnehager. Tenker da spesielt på programfag i videregående og basebarnehager. Videre hvilken effekt hadde begrensninger på fritidsaktiviteter (både organiserte og uorganiserte) sett sammen med kohortene sin integritet. |
| 26 | 1) Korleis påverka nedstenginga arbeidsmiljøet og arbeidspresset for lærarar, leiarar og andre tilsette? Korleis fungerte samarbeid, personaloppfølging, trivsel og oppleving av tryggleik? How did the lockdown affect the work environment and workload for teachers, leaders, and other staff? How did collaboration, personnel support, well-being, and the perception of safety function? |
| 27 | 3) Korleis fungerte dialogen mellom partane om tiltak som vart innførte? Kven vart involverte og lytta til? / How did the dialogue between the parties regarding the implemented measures work? Who was involved and listened to? |
| 28 | I hvilke settinger er koronapass akseptabelt og gjennomførbart når belastning og kostnader sees i forhold til effekt på smittespredning og forekomst av infeksjoner? |
| 29 | Når og i så fall hvor lenge er innreiseforbud fra høy-endemiske områder akseptabelt og gjennomførbart når belastning og kostnader sees i forhold til effekt på smittespredning og forekomst av infeksjoner? |
| 30 | Clarify which type of infectious diseases this actually is relevant, given that it was impossible during COVID-19 to stop the introduction of new variants to Norway. |
| 31 | Når og i så fall hvor lenge er testing og koronapass akseptabelt og gjennomførbart når belastning og kostnader sees i forhold til effekt på smittespredning og forekomst av infeksjoner? |
| 32 | Når og i så fall hvor lenge er testing og koronapass akseptabelt og gjennomførbart når belastning og kostnader sees i forhold til effekt på smittespredning og forekomst av infeksjoner? |
| 33 | Når og i så fall hvor lenge er stenging av grenser akseptabelt og gjennomførbart når belastning og kostnader sees i forhold til effekt på smittespredning og forekomst av infeksjoner? |
| 34 | What level of restriction is necessary to contain a disease? |
| 35 | what is the long term costs related to worsened relation to neighbouring countries |
| 36 | What is the risk of infection in different services? Which services can remain open if they are able to implement measures that limit the risk of transmission? |
| 37 | what is the effect on transmission,  what is the cost for society? individuals? When will this be cost effective? |
| 38 | Can there be settings/circumstances where it would make sense for the healthy part of the population to expose oneself for infection in order to decrease the number of susceptible, thereby reducing R and limiting the number of infection control measures in place? |
| 39 | what are the preferences of people in protected groups; do they want to be shielded |
| 40 | what are low burden shielding mechanisms, and their effect. |
| 41 | Hvilke begrensninger på besøk i sykehjem er akseptable og gjennomførbare når belastning og kostnader sees i forhold til effekt på smittespredning og forekomst av infeksjoner? |
| 42 | Examine residents preferences concerning risk of infection with open nursing homes verus nursing home remaining close. |
| 43 | Nursing homes: what is the effect on transmission  what are the psychosocial costs of the individual protected |
| 44 | What are the values presented by the protected individuals; do they prefer protection or physical contact.. |
| 45 | What preferences do the relatives have |
| 46 | what are the cost on young peoples social life |
| 47 | societal costs |
| 48 | Hvilke målrettede informasjonstiltak (som kampanjer, møter, formulering av tekst mm.) gir størst effekt i form av økt kunnskap og økt etterlevelse? |
| 49 | Hvordan kan man bedre nå ut til alle grupper i samfunnet på rett språk, rett miljø, rette personer og rette kanaler? Vi klarte ikke dette under denne pandemien, men det må være på plass fra første stund. |
| 50 | what are the best channels to provide information to improve compliance what are key factors to uphold high trust between population and authorities when informing |
| 51 | Hva var forskjellene mellom kommuner, regioner og land, i forhold til hvordan de organiserte håndteringen av covid-pandemien? Var det visse former for organisering av covid-arbeidet som i større grad enn andre er assosiert med redusert forekomst av infeksjoner, sykehusinnleggelser og død i løpet av ulike faser av covid-pandemien? |
|  |  |
|  |  |
