# Supplementary material for: Research priorities for public health and social measures to manage epidemics: a multi-method consensus study
Source: Research Square preprint supplement (doi:10.21203/rs.3.rs-5519570/v1), 2026-02-09
Supplement: Supplementary file 5 [file 831eaae97332ee0dbfffae7a.xlsx]

## Sheet: Sheet1
WHO-taxonomy, main categories	Subcategory 1	Subcategory 2	Interventions	Targeted groups/settings/scope
1. Individual measures	1.1 Performing hand hygiene		1.1.1. Perform hand hygiene with soap and water or hand sanitizer	All, schools, businesses, institutions etc.
	1.2 Limiting face touching		1.2.1. Avoid touching the face	All
	1.3 Performing respiratory etiquette		1.3.1. Cough or sneeze into the elbow or a disposable tissue	All
	1.4 Wearing a mask		1.4.1. Wear a face mask	All or vulnerable groups, when in contact with others, when sick or with symptoms
			1.4.2. Use face mask, or resprator mask (FFP2/3)	In specific professions (taxi-/busdrivers, health care workers, police)
	1.5 Using other personal protective equipment (PPE)		1.5.1. Use gloves, glasses/visor, or other PPE	All, in public places
			1.5.2. Advise against the use of gloves	All, in public places
			1.5.3. Use PPE at work	Employees in institutions or on flights
	1.6 Physical distancing		1.6.1. Keep a distance (1-2 meters) from others	All, outside home
			1.6.2. Avoid handshakes, hugs, kisses	All
			1.6.3. Wear a face mask if distance cannot be avoided	All
			1.6.4. Avoid queues and crowds	All, outside home
			1.6.5. Limit the number of regular contacts	All
2. Environmental measures	2.1 Cleaning and disinfecting surfaces and objects		2.1.1. Regular cleaning and disinfection of surfaces and objects	All, buildings use by many
			2.1.2. Thorough disinfection before start-up	Schools after closure, flights, health care facilities
			2.1.3. Extensive disinfection with spraying, flushing, fumigation, UV-light, etc	Public places outside, objects, goods, public transport, persons
			2.1.4. Quarantine period before use	Imported goods
	2.2 Improving air ventilation		2.2.1. Regular ventilation of rooms	Rooms used by many
			2.2.2. Monitor ventilation	Rooms used by many
			2.2.3. Maintain/ensure proper ventilation	Rooms used by many, schools, health care facilities
			2.2.4. Use bactericide recircultators (UV-light)	Airports, large buildings, planes etc.
			2.2.5. Do not use air conditioning	Rooms used by many, public transport
			2.2.6. Prioritize outdoor activities	Fitness
	2.3 Increasing room humidification		2.3.1. Use a humidifier or spay rooms regularly	Rooms used by many
3. Testing, Isolation, Contact tracing, Quarantine and Surveillance	3.1 Detecting and isolating cases	3.1.1 Passive case detection	3.1.1.1. Targeted (indication-led) testing	Travelers from high-endemic areas, hospitalized, alle with defined symptoms
			3.1.1.2. Test to protect vulnerable persons/groups	Employees and visitors in institutions
			3.1.1.3. Make rapid tests available	All with symptoms, or after contact with known cases
		3.1.2 Active case detection	3.1.2.1. Targeted screening in specific populations	All students, employees and patients/residents in institutuions
			3.1.2.2. Random mass testing	Door-to-door, all in public places
			3.1.2.3. Checkpoints with control of temperature/symptoms and testing	Travelers/In public places
		3.1.3 Personal guidance and isolation	3.1.3.1. Individual guidance on infection prevention and control	All cases
			3.1.3.2. Stay home when sick	All cases
			3.1.3.3. Mandatory isolation for defined period with/without testing	All cases, at home or in dedicated isolation facilities
			3.1.3.4. Cohort isolation	Cases at the same place, at home or in institutions
			3.1.3.5. Provide isolation facilities	Cases who cannot be isolated at home
	3.2 Tracing and quarantining contacts	3.2.1 Contact tracing	3.2.1.1. Manual interview of contacts	Contacts of known cases
			3.2.1.2. Develop data management system to support tracing/follow-up of contacts	Contacts of known cases
			3.2.1.3. Use technology enhanced systems to support tracing (mobile app, QR code/registration, web-based self-reporting)	All exposed
			3.2.1.4. Positive cases responsible to notify their close contacts	All cases and close contacts
			3.2.1.5. Use military and police forces for contact tracing	All cases and close contacts
			3.2.1.6. Register travelers	All travelers, or from high-endemic areas
			3.2.1.7. Register guests/visitors	All in defined businesses/services
		3.2.2 Quarantine	3.2.2.1. Define close contacts	Contacts of known cases
			3.2.2.2. Regular follow-up of contacts	Contacts of known cases
			3.2.2.3. Individual guidance on infection prevention and control	Contacts of known cases
			3.2.2.4. Qurarantine for defined period	Contacts, at home or in defined quarantine facilities
			3.2.2.5. Waiting time before or testing instead of quarantine	Contacts without symptoms
			3.2.2.6. Testing to shorten quarantine period	Contacts without symptoms
			3.2.2.7. Garantee paid sick leave/salary to increase compliance with quarantine regulations	Close contacts in danger of losing income during quarantine period
			3.2.2.8. Provide quarantine facilities	Contact who cannot be qurantined at home
	3.3 Surveillance	3.3.1 Confirmed cases	3.3.1.1. Register and publish the number of cases	Measurement of identified cases over time
			3.3.1.2. Microbial genome sequecing	Measurement of distribution of microbe variants
		3.3.2 Symptoms or signals	3.3.2.1. Surveillance of microbes in wastewater	Mearurement of trend
			3.3.2.2. Regular surveys in the population	Mearurement of trend
			3.3.2.3. Surveillance of capasity in healthcare
4. Social and physical distancing measures, adaptation to settings	4.1.School measures	4.1.1 Adapting	4.1.1.1. Have groups with few individuals and limit contact between groups	Children and youth in nurseries and schools
			4.1.1.2. Avoid crowds, start classes at different times, extend school hours	Children and youth in nurseries and schools
			4.1.1.3. Hybrid education/limit the number of in-person learning	Children and youth in nurseries and schools
			4.1.1.4. Work at home and have digital meetings when feasible	Employees in nurseries and schools
			4.1.1.5. Suspend some indoor activities and prioritize outdoor activities	Children and youth in nurseries and schools
			4.1.1.6. Regular screening	Employees, children and students
			4.1.1.7. Use a traffic light system with bundles of measures	Children and youth in nurseries and schools
		4.1.2 Closing	4.1.2.1. Proactive closure when incidence in population increases, without remote learning or excemption	Children and employees in nurseries and schools
			4.1.2.2. Proactive closure with remote learning and/or excemption	Children and employees in nurseries and schools
			4.1.2.3. Reactive closure to stop the spread in schools	Parts of or all of nurseries and schools
	4.2 Offices, businesses, institutions and operations	4.2.1 Adapting	4.2.1.1. Work at home	Employees
			4.2.1.2. Flexible working hours and avoid crowding	Employees
			4.2.1.3. Ensure and organize sufficient infection prevention and control	Employees
			4.2.1.4. Offer and facilitate the use of face masks	Employees, visitors or customers
			4.2.1.5. Install plexiglass/physical barriers and ensure distance	Employees, visitors or customers
			4.2.1.6. Make hand sanitizer available and ensure regular use	Employees, visitors or customers
			4.2.1.7. Register persons present	Employees, visitors or customers
			4.2.1.8. Limit or ban the sale/serving of alcohol	Visitors or customers
			4.2.1.9. Require COVID pass or testing before entry/services	Visitors or customers
			4.2.1.10. Protect particularly exposed professions (PPE, physical barriers, distance)	Employees
		4.2.2 Closing	4.2.2.1. Proactive closure of business	Employees, visitors or customers
			4.2.2.2. Reactive closure of business	Employees, visitors or customers
			4.2.2.3. Closure of activities or services	Employees, visitors or customers
	4.3 Gatherings, businesses and services	4.3.1 Restricting private gatherings at home	4.3.1.1. Prohibit guests	All
			4.3.1.2. Allow a defined number of guests indoors and/or outdoors	All
		4.3.2 Cancelling, restricting or adapting private gatherings outside the home	4.3.2.1. Prohibit gatherings	All
			4.3.2.2. Allow a defined number of people present	All
			4.3.2.3. Allow a defined number of people per square meter	All
		4.3.3. Cancelling, closing, restricting or adapting public gatherings outside the home	4.3.3.1. Prohibit gatherings	All
			4.3.3.2. Allow a defined number of people present	All
			4.3.3.3. Allow a defined number of people per square meter	All
			4.3.3.4. Allow a defined rate of full capasity of the premises	All
			4.3.3.5. Allow rehearsal/digital events without an audience present	All
			4.3.3.6. Avoid queuing and crowding	All
			4.3.3.7. Use physical barriers and facilitate distancing	All
		4.3.4 Cancelling, restricting or adapting mass gatherings	4.3.4.1. Ban events	All
			4.3.4.2. Allow a defined number of people present	All
			4.3.4.3. Allow a defined number of people per square meter	All
			4.3.4.4. Allow a defined rate of full capasity of the premises	All
			4.3.4.5. Allow competitions/events without an audience present	All
			4.3.4.6. Avoid queuing and crowding	All
			4.3.4.7. Use physical barriers and facilitate distancing	All
			4.3.4.8. Perform risk analysis and develop infection control plan	All
	4.4 Special populations	4.4.1 Shielding vulnerable groups	4.4.1.1. Stay at home, avoid visits, or limit the number of contacts	Eldrly and high-risk groups
			4.4.1.2. Avoid travel	Eldrly and high-risk groups
			4.4.1.3. Offer regular digital follow-up	Eldrly and high-risk groups
			4.4.1.4. Bring necessary goods and services home	Eldrly and high-risk groups
			4.4.1.5. Have dedicated opening hours in public places, retail and services	Eldrly and high-risk groups
			4.4.1.6. Prioritize testing, examination and treatment, and vaccination	Eldrly and high-risk groups
			4.4.1.7. Closing of health-, social- and child welfare services/only digital services
		4.4.2 Protecting populations in closed settings	4.4.2.1. Ensure and organize sufficient infection prevention and control	Employees
			4.4.2.2. Prohibit or limit visits	Visitors
			4.4.2.3. Use PPE in professional practice	Employees
			4.4.2.4. Regular testing	Employees or residents/patients/inmates
			4.4.2.5. Prioritize testing, examination and treatment, and vaccination	Employees or residents/patients/inmates
			4.4.2.6. Postpone elective admissions or non-urgent tasks	Employees or residents/patients/inmates
			4.4.2.7. Hasten discharge	Patients/inmates
			4.4.2.8. Cohorts of personnel
		4.4.3 Protecting displaced populations	4.4.3.1. Close entry and exit	Asylum centres/refugee camps
			4.4.3.2. Stop or limit visits	Asylum centres/refugee camps
			4.4.3.3. Intensify testing and health examinations	Migrants
			4.4.3.4. Reduce the number of residents per unit and organize in groups or cohorts	Migrants
			4.4.3.5. Ensure resources and space for isoltion and quarantine	Migrants
	4.5 Domestic travel	4.5.1 Suspending or restricting movement	4.5.1.1. Prohibit or limit public transport	All
			4.5.1.2. Limit travel across local/regional borders	All
			4.5.1.3. Limit the number of passengers aboard buses, trains, boats and other public transport	All
		4.5.2 Stay-at-home order	4.5.2.1. Curfew, stay-at-home order and only leave house if necessary	All
			4.5.2.2. Close down trade and services during curfew, or only keep open for defined target groups	All, eldrly and high-risk groups
			4.5.2.3. Children and youth under 18 must be escorted when outside	Children and youth
		4.5.3 Restricting entry	4.5.3.1. Require COVID pass or testing and quarantine upon arrival for a high-endemic area	All
			4.5.3.1. Ban overnight stays in holiday homes	All
		4.5.4 Closing internal land borders	4.5.4.1. Stop domestic transport across local borders	Flights, train and other regional transport
			4.5.4.2. Prevent people on ships from going ashore	Employees and passengers on ferries and ships
			4.5.4.3. Prohibition of entry to Svalbard for persons with quarantine obligation	All contacts, exposed and travelers from high-risk areas
	4.6 Measures to increase support and compliance	4.6.1 Inform about and increase support for pandemic measures	4.6.1.1. Information campaigns	All, specific vulnerable or marginalized groups
			4.6.1.2. Call center, ongoing advisory service for the population	General population, local authorities, businesses or services
			4.6.1.3. Advisory team, ongoing advisory to local health authorities for assessment and coordination of measures	Local and regional health authorities
			4.6.1.4. Press conferences	All
			4.6.1.5. Coordination of government communication	All, population groups, businesses and services
			4.6.1.6. Infodemic management, monitoring and management of misinformation and increase trust and compliance to measures	All
			4.6.1.7. Translate measures and information	Non-native speakers
			4.6.1.8. Reach out to subpopulations and provide targeted information	Marginalized groups, or persons not seeking information from the health authorities or domestic media
			4.6.1.9. Use the interpreter service when conveying information	Marginalized groups, or persons not seeking information from the health authorities or domestic media
			4.6.1.10. Use key persons in the community to disseminate information	Marginalized groups, or persons not seeking information from the health authorities or domestic media
		4.6.2 Supervision and control	4.6.2.1. Supervision of infection contol in the municipalities by the County Governor	Local authorities, general population
			4.6.2.2. Guidelines and provisions for local management by the Directorate of Health	Local authorities, institutions, businesses, general population
			4.6.2.3. Supervision of companies' protection of employees by the Labour Inspection Authority	Managers and employees of businesses and institutions
			4.6.2.4. Supervision of infection control in health services and management of the pandemic, by the Board of Health Supervision	Managers and employees in health care
			4.6.2.5. Public committee evaluation of government management of the pandemic	National authorities
	4.7 Organization of pandemic management	4.7.1 Organization of infection control/pandemic management	4.7.1.1. National strategy and organization	National authorities
			4.7.1.2. Regional/local organization and management	Regional and local authorities
			4.7.1.3. National/local preparedness prior to the pandemic	National and local authorities
			4.7.1.4. Redeployment of resources in the health services to handle the pandemic	Managers, employees and patients in health care
5. International travel measures	5.1 Providing travel advice and warning		5.1.1. Travel advice and warnings against travel to high-endemic areas	All
	5.2 Restricting visas		5.2.1. Suspension of visas upun arrival	All travelers or from high-risk areas
			5.2.2. Limit the possibility of visas	All travelers or from high-risk areas
	5.3 Restricting entry		5.3.1. Deny entry from all or high-endemic areas	All travelers or from high-risk areas
			5.3.2. Limit entry from all or high-endemic areas	All travelers or from high-risk areas
	5.4 Restricting exit		5.4.1. Prohibit travel out of the country to high-endemic areas	All, key personnel in health care or emergency units
			5.4.2. Limit travel out of the country to high-endemic areas	All, key personnel in health care or emergency units
	5.5 Entry screening and isolation or quarantine		5.5.1. Assess exposure or check temperature, symptoms, vaccination status etc.	All travelers or from high-risk areas
			5.5.2. Establish a control center that follows up on new arrivals	All travelers or from high-risk areas
			5.5.3. Require COVID pass or test upon arrival	All travelers or from high-risk areas
			5.5.4. Isolation of travelers with symptoms or positive test	All possible or confirmed cases
			5.5.5. Quarantine for all	All travelers, at home or dedicated quarantine facility
			5.5.6. Quarantine on an individual basis	All travelers, at home or dedicated quarantine facility
	5.6 Exit screening and isolation or quarantine		5.6.1. Demand for a COVID pass or recent test before departure	All travelers, based on requirements at country of entry
	5.7 Suspending or restricting international fligths		5.7.1. Suspend international flights to or from high-endemic areas	All travelers
			5.7.2. Limit international flights to or from high-endemic areas	All travelers
			5.7.3. Contact tracing after flights	All travelers
	5.8 Suspend or restricting international ferries or ships		5.8.1. Prohibit shipping or entry into the country	Employees and passengers
			5.8.2. Suspend cruises from other countries, or stop employees and passangers from disembarking	Employees and passengers
			5.8.3. Stop further travel upon suspicion of an outbreak on board	Employees and passengers
			5.8.4. Outbreak management on board ships	Employees and passengers
			5.8.5. Contact tracing after ship travel	All travelers
	5.9 Closing international land borders		5.9.1. Close the borders	All travelers
			5.9.2. Local control with all closed borders	All travelers
